# Supplementary material for: Association between carotid artery perivascular fat density and cerebral small vessel disease
Source: publisher site journal article supplement (doi:10.18632/aging.203327), 2021-07-21
Supplement: Supplementary file [file aging-v13i14-203327-supplementary-material-SD1.pdf]

## SUPPLEMENTARY FIGURE

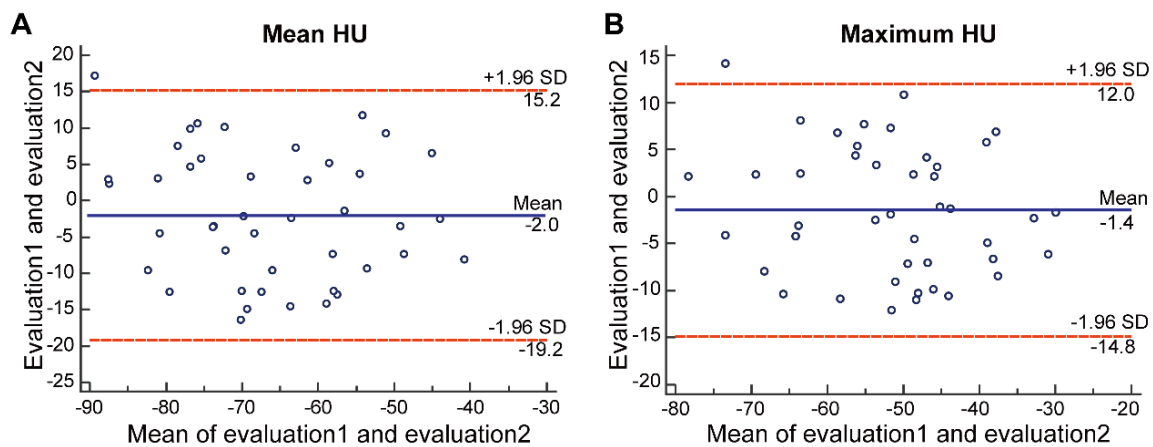

**Supplementary Figure 1. The Bland-Altman analysis for the two evaluation. (A) for mean HU, and (B) for maximum HU.** Abbreviation, HU, hounsfield unit.
