# Supplementary material for: Association between carotid artery perivascular fat density and cerebral small vessel disease
Source: publisher site journal article supplement (doi:10.18632/aging.203327), 2021-07-21
Supplement: Supplementary file [file aging-v13i14-203327-supplementary-material-SD2.pdf]

**SUPPLEMENTARY TABLE**

**Supplementary Table 1. Association between the perivascular fat density and CSVD risk factors**

| Characteristics        | Mean HU      |              |              | Maximum HU   |              |          |
|------------------------|--------------|--------------|--------------|--------------|--------------|----------|
|                        | No           | Yes          | <i>P</i>     | No           | Yes          | <i>P</i> |
| Male, n (%)            | -76.89±13.34 | -77.55±12.88 | 0.564        | -61.52±14.68 | -62.99±14.48 | 0.249    |
| Hypertension           | -79.34±12.55 | -76.72±13.13 | <b>0.043</b> | -64.63±13.96 | -61.84±14.68 | 0.054    |
| Diabetes mellitus      | -78.01±12.73 | -76.26±13.45 | 0.117        | -62.99±14.57 | -61.70±14.53 | 0.301    |
| Hyperlipidemia         | -78.75±13.71 | -76.40±12.50 | <b>0.040</b> | -63.82±15.47 | -61.62±13.89 | 0.079    |
| Coronary heart disease | -77.58±13.00 | -76.59±13.13 | 0.423        | -62.77±14.60 | -61.68±14.46 | 0.426    |
| Atrial fibrillation    | -77.76±12.82 | -76.14±13.57 | 0.188        | -63.04±14.40 | -60.99±14.91 | 0.134    |
| Current smoking        | -77.87±13.22 | -76.18±12.60 | 0.148        | -63.05±14.80 | -61.30±13.99 | 0.179    |
| Drinking               | -77.34±13.05 | -77.23±13.03 | 0.941        | -62.36±14.70 | -63.06±13.88 | 0.668    |
